# Supplementary material for: Identification of the genetic and clinical characteristics of neuroblastomas using genome-wide analysis
Source: PubMed Central journal article supplement (PMC5746085; doi:10.18632/oncotarget.22495), 2017-11-18
Supplement: oncotarget-08-107513-s001.pdf [file oncotarget-08-107513-s001.pdf]

# Identification of the genetic and clinical characteristics of neuroblastomas using genome-wide analysis

## SUPPLEMENTARY MATERIALS

**Supplementary Table 1: List of detected mutations by targeted amplicon sequencing**

| Gene   | Location | Mutation Type | Refseq       | Amino acid change | Position  | Allele change | Frequency |
|--------|----------|---------------|--------------|-------------------|-----------|---------------|-----------|
| ALK    | 2p       | Missense      | NM_004304    | p.R1275Q          | 29432664  | C>T           | 17        |
| ALK    | 2p       | Missense      | NM_004304    | p.F1174L          | 29443695  | G>T           | 14        |
| ALK    | 2p       | Missense      | NM_004304    | p.F1174V          | 29443697  | A>C           | 2         |
| ALK    | 2p       | Missense      | NM_004304    | p.T1151M          | 29443631  | G>A           | 1         |
| ALK    | 2p       | Missense      | NM_004304    | p.T1087L          | 29446307  | G>A           | 1         |
| ALK    | 2p       | Missense      | NM_004304    | p.L1196M          | 29443631  | G>T           | 1         |
| ALK    | 2p       | Missense      | NM_004304    | p.F1245L          | 29436858  | G>T           | 1         |
| ALK    | 2p       | Missense      | NM_004304    | p.R1192P          | 29443642  | C>G           | 1         |
| ALK    | 2p       | Missense      | NM_004304    | p.F1245C          | 29436859  | A>C           | 1         |
| MYCN   | 2p       | Missense      | NM_001293228 | p.P44L            | 16082317  | C>T           | 1         |
| MYCN   | 2p       | Missense      | NM_001293228 | p.E69G            | 16082392  | A>G           | 1         |
| ATRX   | Xq       | Missense      | NM_138270    | p.I536V           | 76939028  | T>C           | 2         |
| ATRX   | Xq       | Nonsense      | NM_138270    | p.E1871X          | 76855262  | C>A           | 1         |
| ATRX   | Xq       | Missense      | NM_138270    | p.S2148Y          | 76813064  | G>T           | 1         |
| ATRX   | Xq       | Frameshift    | NM_138270    | p.P1333fs         | 76918878  | TC>           | 1         |
| ATRX   | Xq       | Missense      | NM_138270    | p.Q2145H          | 76813072  | C>A           | 1         |
| ATRX   | Xq       | Nonsense      | NM_138270    | p.R2073X          | 76814313  | G>A           | 1         |
| ATRX   | Xq       | Missense      | NM_138270    | p.D1013H          | 76937597  | C>G           | 1         |
| ATRX   | Xq       | Missense      | NM_138270    | p.T2162P          | 76813023  | T>G           | 1         |
| ATRX   | Xq       | Missense      | NM_138270    | p.I1170T          | 76937125  | A>G           | 1         |
| ARID1A | 1p       | Missense      | NM_006015    | p.A221V           | 27023556  | C>T           | 1         |
| ARID1A | 1p       | Missense      | NM_006015    | p.D2129E          | 27106776  | C>A           | 1         |
| ARID1A | 1p       | Missense      | NM_006015    | p.P1521S          | 27101279  | C>T           | 1         |
| ARID1A | 1p       | Missense      | NM_006015    | p.I1691V          | 27102145  | A>G           | 1         |
| ARID1A | 1p       | Missense      | NM_006015    | p.S303T           | 27023802  | G>C           | 1         |
| ARID1A | 1p       | Missense      | NM_006015    | p.N874S           | 27089665  | A>G           | 1         |
| ARID1A | 1p       | Nonsense      | NM_006015    | p.Q200X           | 27023492  | C>T           | 1         |
| ARID1A | 1p       | Nonsense      | NM_006015    | p.E2246X          | 27107125  | G>T           | 1         |
| ARID1A | 1p       | Missense      | NM_006015    | p.G1761C          | 27105670  | G>T           | 1         |
| ARID1A | 1p       | Missense      | NM_006015    | p.D1196N          | 27099349  | G>A           | 1         |
| ARID1A | 1p       | Missense      | NM_006015    | p.G1016S          | 27094338  | G>A           | 1         |
| ARID1A | 1p       | Missense      | NM_006015    | p.Y471C           | 27057704  | A>G           | 1         |
| ARID1A | 1p       | Missense      | NM_006015    | p.N874S           | 27089665  | A>G           | 1         |
| ARID1A | 1p       | Missense      | NM_006015    | p.P1771S          | 27105700  | C>T           | 1         |
| ARID1A | 1p       | Nonsense      | NM_006015    | p.S1138X          | 27098997  | C>A           | 1         |
| ARID1B | 6q       | Missense      | NM_017519    | p.Q912H           | 157469981 | G>T           | 1         |
| ARID1B | 6q       | Missense      | NM_017519    | p.T1819S          | 157527770 | C>G           | 1         |
| ARID1B | 6q       | Missense      | NM_017519    | p.A471T           | 157100474 | G>A           | 1         |
| ARID1B | 6q       | Missense      | NM_017519    | p.Q83H            | 157099312 | G>T           | 1         |
| ARID1B | 6q       | Missense      | NM_017519    | p.Q1709H          | 157527441 | G>T           | 2         |
| ARID1B | 6q       | Nonframeshift | NM_017519    | p.A445            | 157100396 | →CGC          | 1         |
| ARID1B | 6q       | Missense      | NM_017519    | p.R1789Q          | 157527680 | G>A           | 1         |
| ARID1B | 6q       | Missense      | NM_017519    | p.M2119V          | 157528669 | A>G           | 1         |
| ARID1B | 6q       | Missense      | NM_017519    | p.L64P            | 157099254 | T>C           | 1         |
| ARID1B | 6q       | Missense      | NM_017519    | p.M960T           | 157488212 | T>C           | 1         |
| ARID1B | 6q       | Missense      | NM_017519    | p.S49F            | 157099209 | C>T           | 4         |
| ARID1B | 6q       | Missense      | NM_017519    | p.P488L           | 157100526 | C>T           | 1         |
| ARID1B | 6q       | Missense      | NM_017519    | p.N1659S          | 157525120 | A>G           | 1         |
| ARID1B | 6q       | Missense      | NM_017519    | p.A1993V          | 157528292 | C>T           | 1         |
| ARID1B | 6q       | Nonframeshift | NM_017519    | p.Q120            | 157099423 | →CAA          | 1         |
| ARID1B | 6q       | Missense      | NM_017519    | p.A460V           | 157100442 | C>T           | 1         |
| ARID1B | 6q       | Missense      | NM_017519    | p.K1612N          | 157522603 | G>T           | 1         |
| ARID1B | 6q       | Missense      | NM_017519    | p.Q563L           | 157150506 | A>T           | 1         |
| PHOX2B | 4p       | Missense      | NM_003924    | p.S311N           | 41747837  | C>T           | 1         |
| PHOX2B | 4p       | Missense      | NM_003924    | p.K168R           | 41748266  | T>C           | 1         |
| PHOX2B | 4p       | Missense      | NM_003924    | p.D177E           | 41748238  | G>C           | 1         |
| PHOX2B | 4p       | Frameshift    | NM_003924    | p.G268fs          | 41747966  | C>            | 2         |
| PTPN11 | 12q      | Missense      | NM_002834    | p.G503A           | 112926888 | G>C           | 2         |
| PTPN11 | 12q      | Nonframeshift | NM_002834    | p.59-60del        | 112888159 | ACTGGT>       | 1         |
| HRAS   | 11p      | Missense      | NM_001130442 | p.G12S            | 534289    | C>T           | 1         |
| HRAS   | 11p      | Nonsense      | NM_001130442 | p.Q70X            | 533848    | G>A           | 1         |
| KRAS   | 12p      | Missense      | NM_004985    | p.K117N           | 25378647  | T>G           | 1         |
| KRAS   | 12p      | Missense      | NM_004985    | p.G12V            | 25398284  | C>A           | 1         |
| NRAS   | 1p       | Missense      | NM_002524    | p.C51R            | 115256560 | A>G           | 1         |
| NRAS   | 1p       | Missense      | NM_002524    | p.A59D            | 115256535 | G>T           | 1         |

**Supplementary Table 2: Comparison of genetic and clinical characteristics between groups A1 and A2**

|                          | A1<br>No. (%) | A2<br>No. (%) | X <sup>2</sup> Test<br>* <i>Pc</i> value |
|--------------------------|---------------|---------------|------------------------------------------|
| Total                    | 27            | 20            |                                          |
| 1p LOH                   | 24 (88.9)     | 3 (15.0)      | <0.0001                                  |
| 1q gain                  | 4 (16.7)      | 5 (25.0)      | 1.00                                     |
| Whole 2 gain             | 9 (33.3)      | 13 (65.0)     | 0.72                                     |
| 2p gain                  | 9 (33.3)      | 7 (35.0)      | 1.00                                     |
| 3p LOH                   | 4 (14.8)      | 2 (10.0)      | 1.00                                     |
| 4p LOH                   | 0 (0)         | 2 (10.0)      | 1.00                                     |
| 5p gain                  | 2 (7.4)       | 1 (5.0)       | 1.00                                     |
| 6q LOH                   | 2 (7.4)       | 4 (20.0)      | 1.00                                     |
| 7q or whole 7 gain       | 1 (3.7)       | 8 (40.0)      | <u>0.029</u>                             |
| 8p LOH                   | 2 (7.4)       | 4 (20.0)      | 1.00                                     |
| 11q LOH                  | 3 (11.1)      | 8 (40.0)      | 0.48                                     |
| 12q or whole 12 gain     | 0 (0)         | 6 (30.0)      | <u>0.017</u>                             |
| 17q gain                 | 23 (85.2)     | 8 (40.0)      | <u>0.026</u>                             |
| Whole 17 gain            | 0 (0)         | 8 (40.0)      | <u>0.0016</u>                            |
| 19p LOH                  | 1 (3.7)       | 3 (15.0)      | 1.00                                     |
| 19p or whole19 loss      | 2 (7.4)       | 5 (25.0)      | 1.00                                     |
| 19q LOH                  | 0 (0)         | 1 (5.0)       | 1.00                                     |
| 19q or whole 19 loss     | 1 (3.7)       | 3 (15.0)      | 1.00                                     |
| 22q LOH                  | 0 (0)         | 1 (5.0)       | 1.00                                     |
| Stage 4                  | 22 (81.5)     | 11 (55.0)     | 1.00                                     |
| INPC                     | FH:0 UH:13    | FH:8 UH:2     | <u>0.00022</u>                           |
| Relapsed cases           | 9 (47.4)      | 2 (14.3)      | 0.96                                     |
| Primary: adrenal glands  | 16 (88.9)     | 7 (53.8)      | 0.65                                     |
| Age at diagnosis: median | 29 month      | 14.5 month    | 1.00 <sup>†</sup>                        |

\*The *Pc* values were adjusted by using Bonferroni's correction for multiple comparisons.

<sup>†</sup>The *P* values were calculated by Mann-Whitney *U*-Test. LOH: loss of heterozygosity.

**Supplementary Table 3: Characteristics of 500 neuroblastoma patients**

| Characteristics  | No. (%)                                                 |                                                              |
|------------------|---------------------------------------------------------|--------------------------------------------------------------|
| Total            | 500                                                     |                                                              |
| Stage            | 1<br>2<br>3<br>4<br>4S                                  | 65 (13.0)<br>44 (8.8)<br>86 (17.2)<br>283 (56.6)<br>22 (4.4) |
| Gender           | M<br>F                                                  | 284 (56.8)<br>216 (43.2)                                     |
| Age              | y < 1.5 years<br>1.5 years ≤ y < 5 years<br>y ≥ 5 years | 187 (37.4)<br>227 (45.4)<br>86 (17.2)                        |
| Follow up period | Medians (range)                                         | 29 months (0–60)                                             |
| Outcome          | Alive<br>Dead                                           | 355 (71.0)<br>145 (29.0)                                     |

**Supplementary Table 4: Comparison of genetic and clinical characteristics between neuroblastoma patients with age y < 5 years and y ≥ 5 years**

|                         | y < 5 years<br>No. (%) | y ≥ 5 years<br>No. (%) | X <sup>2</sup> Test<br>*Pc value |
|-------------------------|------------------------|------------------------|----------------------------------|
| Total                   | 414                    | 86                     |                                  |
| 1p LOH                  | 130 (31.4)             | 21 (24.4)              | 1.00                             |
| 1q gain                 | 50 (12.1)              | 16 (18.6)              | 1.00                             |
| 2p gain                 | 79 (19.1)              | 21 (24.4)              | 1.00                             |
| 3p LOH                  | 56 (13.5)              | 23 (26.7)              | 0.070                            |
| 4p LOH                  | 31 (7.5)               | 13 (15.1)              | 0.612                            |
| 5p gain                 | 32 (7.7)               | 6 (7.0)                | 1.00                             |
| 6q LOH                  | 25 (6.0)               | 10 (11.6)              | 1.00                             |
| 7q or whole 7 gain      | 142 (34.3)             | 39 (45.5)              | 0.99                             |
| 8p LOH                  | 22 (5.3)               | 7 (8.1)                | 1.00                             |
| 11q LOH                 | 104 (25.1)             | 37 (43.0)              | <u>0.020</u>                     |
| 12q gain                | 42 (10.1)              | 16 (18.6)              | 0.63                             |
| 12q or whole 12 gain    | 122 (29.5)             | 25 (29.1)              | 1.00                             |
| 17q gain                | 305 (73.7)             | 62 (72.1)              | 1.00                             |
| 19p LOH                 | 20 (4.8)               | 13 (15.1)              | <u>0.031</u>                     |
| 19q LOH                 | 24 (5.8)               | 13 (15.1)              | 0.11                             |
| 22q LOH                 | 12 (2.9)               | 19 (22.1)              | <u>&lt;0.0001</u>                |
| Relapsed cases          | 66 (22.5)              | 8 (18.4)               | 1.00                             |
| Primary: adrenal glands | 207 (71.9)             | 34 (66.7)              | 1.00                             |

\*The Pc values were adjusted by using Bonferroni's correction for multiple comparisons. LOH: loss of heterozygosity.

**Supplementary Table 5: Multivariate analysis for the effects of genetic and clinical factors on overall survival of neuroblastoma patients with over 5 years**

|          | No. | Hazard ratio | <i>P</i> value | 95% CI             |
|----------|-----|--------------|----------------|--------------------|
| 6q LOH   | 10  | 1.44         | 0.40           | 0.60–3.13          |
| 8p LOH   | 7   | 1.45         | 0.44           | 0.53–3.39          |
| 17q gain | 60  | 2.75         | 0.064          | 0.95–11.69         |
| Stage 4  | 62  | <u>7.94</u>  | <u>0.0060</u>  | <u>1.63–143.23</u> |

LOH: loss of heterozygosity.

**Supplementary Table 6: Twenty-three genes in the common region of 8p LOH in older patients**

| Gene name           | Ref Seq      | Start   | End     |
|---------------------|--------------|---------|---------|
| <i>OR4F21</i>       | NM_001005504 | 116085  | 117024  |
| <i>RPL23AP53</i>    | NR_003572    | 158344  | 182318  |
| <i>ZNF596</i>       | NM_001042415 | 182459  | 197340  |
| <i>FAM87A</i>       | NR_103537    | 325930  | 333174  |
| <i>FBXO25</i>       | NM_012173    | 356807  | 419875  |
| <i>TDRP</i>         | NM_175075    | 439789  | 495781  |
| <i>ERICH1</i>       | NM_001303100 | 564736  | 681239  |
| <i>DLGAP2</i>       | NM_001346810 | 687718  | 1656642 |
| <i>LOC401442</i>    | NR_134292    | 688547  | 690374  |
| <i>LOC286083</i>    | NR_111948    | 1244293 | 1250823 |
| <i>DLGAP2-AS1</i>   | NR_103863    | 1513675 | 1569830 |
| <i>LOC101927752</i> | NR_134303    | 1710128 | 1712750 |
| <i>CLN8</i>         | NM_018941    | 1703944 | 1734738 |
| <i>MIR3674</i>      | NR_037445    | 1749290 | 1749358 |
| <i>MIR596</i>       | NR_030326    | 1765396 | 1765473 |
| <i>ARHGEF10</i>     | NM_001308153 | 1772142 | 1906807 |
| <i>LOC101928058</i> | NR_136274    | 1919344 | 1921511 |
| <i>KBTBD11-OT1</i>  | NR_126346    | 1919562 | 1924610 |
| <i>KBTBD11</i>      | NM_014867    | 1922044 | 1955102 |
| <i>MYOM2</i>        | NM_003970    | 1993155 | 2113475 |
| <i>MIR7160</i>      | NR_106983    | 2024668 | 2024720 |
| <i>LOC101927815</i> | NR_125425    | 2387218 | 2585991 |
| <i>CSMD1</i>        | NM_033225    | 2792875 | 4852494 |

**Supplementary Table 7: Comparison of genetic and clinical characteristics between relapsed and refractory neuroblastoma patients**

|                             | <b>Relapse<br/>No. (%)</b> | <b>Refractory<br/>No. (%)</b> | <b>X<sup>2</sup> Test<br/>*Pc value</b> |
|-----------------------------|----------------------------|-------------------------------|-----------------------------------------|
| Total                       | 75                         | 36                            |                                         |
| 1p LOH                      | 39 (52.0)                  | 16 (44.4)                     | 1.00                                    |
| 1q gain                     | 21 (28.0)                  | 4 (11.1)                      | 0.771                                   |
| 2p gain                     | 20 (26.7)                  | 9 (25.0)                      | 1.00                                    |
| 3p LOH                      | 24 (32.0)                  | 8 (22.2)                      | 1.00                                    |
| 4p LOH                      | 5 (6.7)                    | 6 (16.7)                      | 1.00                                    |
| Whole 5 gain                | 11 (14.7)                  | 3 (8.3)                       | 1.00                                    |
| 6q LOH                      | 9 (12.0)                   | 2 (5.6)                       | 1.00                                    |
| 7q or whole 7 gain          | 28 (37.3)                  | 13 (36.1)                     | 1.00                                    |
| 8p LOH                      | 7 (9.3)                    | 3 (8.3)                       | 1.00                                    |
| 11q LOH                     | 31 (41.3)                  | 15 (41.7)                     | 1.00                                    |
| 11q LOH with 3p LOH         | 15 (20.0)                  | 4 (11.1)                      | 1.00                                    |
| 12q gain                    | 9 (12.0)                   | 6 (16.7)                      | 1.00                                    |
| 12q or whole 12 gain        | 18 (24.0)                  | 10 (27.8)                     | 1.00                                    |
| 17q gain                    | 62 (82.7)                  | 28 (77.8)                     | 1.00                                    |
| 19p LOH                     | 6 (8.0)                    | 4 (11.1)                      | 1.00                                    |
| 19q LOH                     | 6 (8.0)                    | 6 (16.7)                      | 1.00                                    |
| 22q LOH                     | 5 (5.4)                    | 1 (2.8)                       | 1.00                                    |
| <i>MYCN</i> amp             | 37 (49.3)                  | 13 (36.1)                     | 1.00                                    |
| <i>MYCN</i> amp with 1p LOH | 31 (41.3)                  | 11 (30.6)                     | 1.00                                    |
| Stage 4                     | 70 (93.3)                  | 29 (80.6)                     | 1.00                                    |
| Primary: adrenal glands     | 55 (79.7)                  | 28 (82.4)                     | 1.00                                    |

\*The *Pc* values were adjusted by using Bonferroni's correction for multiple comparisons.

LOH: loss of heterozygosity and amp: amplification.

**Supplementary Table 8: Comparison of genetic and clinical characteristics between neuroblastoma patients with relapse and complete remission**

|                      | <b>Relapse<br/>No. (%)</b> | <b>CR<br/>No. (%)</b> | <b>X<sup>2</sup> Test<br/>*Pc value</b> |
|----------------------|----------------------------|-----------------------|-----------------------------------------|
| Total                | 75                         | 232                   |                                         |
| 1p LOH               | 39 (52.0)                  | 58 (25.0)             | <0.00042                                |
| 1q gain              | 21 (28.0)                  | 24 (10.3)             | 0.0084                                  |
| 2p gain              | 20 (26.7)                  | 41 (17.7)             | 1.00                                    |
| 3p LOH               | 24 (32.0)                  | 26 (11.2)             | 0.0013                                  |
| 4p LOH               | 5 (6.7)                    | 21 (9.1)              | 1.00                                    |
| Whole 5 gain         | 11 (14.7)                  | 19 (8.2)              | 1.00                                    |
| 6q LOH               | 9 (12.0)                   | 12 (5.2)              | 1.00                                    |
| 7q or whole 7 gain   | 28 (37.3)                  | 75 (32.3)             | 1.00                                    |
| 8p LOH               | 7 (9.3)                    | 14 (6.0)              | 1.00                                    |
| 11q LOH              | 31 (41.3)                  | 56 (24.1)             | 0.11                                    |
| 11q LOH with 3p LOH  | 15 (20.0)                  | 12 (5.2)              | 0.0063                                  |
| 12q gain             | 9 (12.0)                   | 24 (10.3)             | 1.00                                    |
| 12q or whole 12 gain | 18 (24.0)                  | 60 (25.9)             | 1.00                                    |

|                             |           |            |         |
|-----------------------------|-----------|------------|---------|
| 17q gain                    | 62 (82.7) | 101 (43.5) | <0.0001 |
| 19p LOH                     | 6 (8.0)   | 15 (6.5)   | 1.00    |
| 19q LOH                     | 6 (8.0)   | 12 (5.2)   | 1.00    |
| 22q LOH                     | 5 (5.4)   | 12 (5.2)   | 1.00    |
| <i>MYCN</i> amp             | 37 (49.3) | 43 (18.5)  | <0.0001 |
| <i>MYCN</i> amp with 1p LOH | 31 (41.3) | 38 (16.4)  | 0.00034 |
| Stage 4                     | 70 (93.3) | 95 (41.0)  | <0.0001 |
| Primary: adrenal glands     | 55 (79.7) | 154 (67.5) | 0.987   |

\*The *Pc* values were adjusted by using Bonferroni's correction for multiple comparisons. CR: complete remission, amp: amplification, and LOH: loss of heterozygosity.

**Supplementary Table 9: Risk factors contributing to relapse of neuroblastoma identified by multiple logistic regression analysis**

|                            | No. | Risk ratio    | <i>P</i> value | 95% CI            |
|----------------------------|-----|---------------|----------------|-------------------|
| 1p LOH without <i>MYCN</i> | 28  | 0.83          | 0.73           | 0.28–2.32         |
| 3p LOH without 11q LOH     | 12  | 1.82          | 0.42           | 0.40–7.79         |
| 11q LOH without 3p LOH     | 46  | 1.28          | 0.57           | 0.55–2.93         |
| 11q LOH with 3p LOH        | 27  | <u>2.60</u>   | <u>0.040</u>   | <u>1.04–6.71</u>  |
| 11q LOH with 3p and 4p LOH | 11  | 2.21          | 0.25           | 0.56–8.55         |
| <i>MYCN</i> without 1p LOH | 11  | 2.99          | 0.11           | 0.77–12.19        |
| <i>MYCN</i> with 1p LOH    | 69  | <u>2.14</u>   | <u>0.043</u>   | <u>1.026–4.51</u> |
| Stage 4                    | 165 | <u>12.048</u> | <0.0001        | <u>4.65–37.73</u> |

LOH: loss of heterozygosity.

**Supplementary Table 10: Comparison of genetic and clinical characteristics between neuroblastoma patients with High ALK score and Low ALK score**

|                      | High (4,3)<br>No. (%) | Low (2, 1, 0)<br>No. (%) | X <sup>2</sup> Test<br>* <i>Pc</i> value |
|----------------------|-----------------------|--------------------------|------------------------------------------|
| Total                | 101                   | 158                      |                                          |
| 1p LOH               | 48 (47.5)             | 38 (24.1)                | <u>0.0022</u>                            |
| 1q gain              | 19 (18.8)             | 14 (8.9)                 | 0.46                                     |
| 2p gain              | 33 (32.7)             | 21 (13.3)                | <u>0.0044</u>                            |
| 3p LOH               | 17 (16.8)             | 26 (16.5)                | 1.00                                     |
| 4p LOH               | 14 (13.9)             | 9 (5.7)                  | 0.572                                    |
| 5p gain              | 8 (7.9)               | 15 (9.5)                 | 1.00                                     |
| 6q LOH               | 10 (9.9)              | 7 (4.4)                  | 1.00                                     |
| 7q or whole 7 gain   | 36 (35.6)             | 46 (29.1)                | 1.00                                     |
| 8p LOH               | 7 (6.9)               | 11 (7.0)                 | 1.00                                     |
| 11q LOH              | 40 (39.6)             | 44 (27.9)                | 1.00                                     |
| 12q gain             | 17 (16.8)             | 15 (9.5)                 | 1.00                                     |
| 12q or whole 12 gain | 29 (28.7)             | 33 (20.9)                | 1.00                                     |
| 17q gain             | 75 (74.3)             | 74 (46.8)                | <u>0.00022</u>                           |
| 19p LOH              | 9 (8.9)               | 10 (6.3)                 | 1.00                                     |
| 19q LOH              | 6 (5.9)               | 12 (7.6)                 | 1.00                                     |
| 22q LOH              | 5 (5.0)               | 8 (5.0)                  | 1.00                                     |

|                                   |             |             |         |
|-----------------------------------|-------------|-------------|---------|
| Relapsed cases                    | 29 (29.3)   | 27 (17.3)   | 0.572   |
| Primary site: adrenal glands      | 75 (78.1)   | 95 (61.3)   | 0.11    |
| INPC                              | FH:16 UH:81 | FH:76 UH:71 | <0.0001 |
| <i>MYCN</i> amplification         | 42 (41.6)   | 25 (15.8)   | 0.00010 |
| <i>ALK</i> mutation/amplification | 19 (18.8)   | 10 (6.3)    | 0.048   |
| Stage 4                           | 81 (80.2)   | 71 (44.9)   | <0.0001 |

\*The *P*c values were adjusted by using Bonferroni's correction for multiple comparisons.  
LOH: loss of heterozygosity.

**Supplementary Table 11: Multivariate analysis for overall survival in the patients with intermediate risk group**

|         | No. | Risk ratio | <i>P</i> value | 95% CI      |
|---------|-----|------------|----------------|-------------|
| 1p LOH  | 13  | 3.87       | 0.051          | 1.00–14.26  |
| 4p LOH  | 9   | 2.49       | 0.25           | 0.49–10.14  |
| 11q LOH | 15  | 1.017      | 0.98           | 0.20–4.43   |
| Stage 4 | 34  | 4.29       | 0.044          | 1.041–21.21 |

LOH: loss of heterozygosity.

**Supplementary Table 12: Primer sets for targeted amplicon sequencing.** See Supplementary\_Table\_12

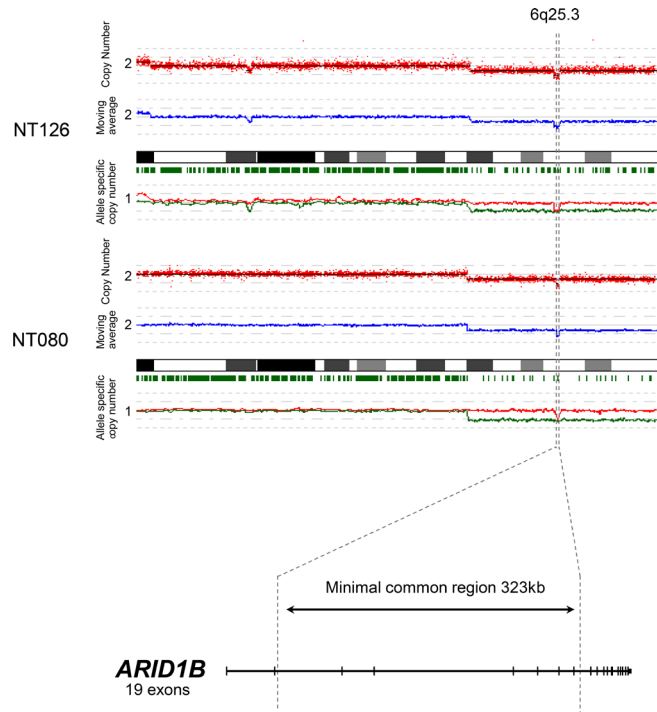

**Supplementary Figure 1: ARID1B as a candidate tumor suppressor gene on chromosome 6q25.3 in neuroblastoma.** Deletion mapping of 6q25.3 disclosed a homozygous deletion spanning a 320kb region in 2 samples (NT080 and NT126), which contains a part of ARID1B as the only structural gene. For each panel, total copy numbers (tCNs) (red dots), moving averages of tCNs for consecutive SNPs (blue line), an ideogram of the relevant chromosome, location of heterozygous SNP calls (green bars), and allele-specific copy numbers (AsCNs) averaged for consecutive SNPs (red and green lines for larger and smaller alleles, respectively) are plotted.
